# Supplementary material for: Pandemrix® vaccination is not associated with increased risk of islet autoimmunity or type 1 diabetes in the TEDDY study children
Source: PubMed Central journal article supplement (PMC5774660; doi:10.1007/s00125-017-4448-3), 2017-10-09
Supplement: NIHMS928111-supplement-Supplemental_Table_1.pdf [file NIHMS928111-supplement-Supplemental_Table_1.pdf]

**Supplementary Table 1.** Description of cohort by country of residence and whether child had received H1N1 vaccination.

|                                                   | H1N1 vaccinated |              |             |              |
|---------------------------------------------------|-----------------|--------------|-------------|--------------|
|                                                   | Finland         |              | Sweden      |              |
|                                                   | No              | Yes          | No          | Yes          |
|                                                   | N (%)           | N (%)        | N (%)       | N (%)        |
| <b>Total</b>                                      | 410 (100%)      | 1028 (100%)  | 578 (100%)  | 1385 (100%)  |
| <b>Age of child March 1<sup>st</sup> 2010</b>     |                 |              |             |              |
| < 6 months                                        | 127 (31.0%)     | 14 (1.4%)    | 189 (32.7%) | 12 (0.9%)    |
| 6 – 12 months                                     | 65 (15.9%)      | 115 (11.2%)  | 78 (13.5%)  | 152 (11.0%)  |
| 12 – 24 months                                    | 50 (12.2%)      | 233 (22.7%)  | 100 (17.3%) | 263 (19.0%)  |
| 24 – 36 months                                    | 49 (12.0%)      | 240 (23.3%)  | 83 (14.4%)  | 322 (23.2%)  |
| 36+ months                                        | 119 (29.0%)     | 426 (41.4%)  | 128 (22.1%) | 636 (45.9%)  |
| <b>Gender</b>                                     |                 |              |             |              |
| Female                                            | 196 (47.8%)     | 503 (48.9%)  | 300 (51.9%) | 660 (47.7%)  |
| Male                                              | 214 (52.2%)     | 525 (51.1%)  | 278 (48.1%) | 725 (52.3%)  |
| <b>Family history of T1D</b>                      |                 |              |             |              |
| No                                                | 371 (90.5%)     | 936 (91.1%)  | 538 (93.1%) | 1278 (92.3%) |
| Yes                                               | 39 (9.5%)       | 92 (8.9%)    | 40 (6.9%)   | 107 (7.7%)   |
| <b>Maternal age at birth of child</b>             |                 |              |             |              |
| <25 years                                         | 89 (21.7%)      | 140 (13.6%)  | 86 (14.9%)  | 130 (9.4%)   |
| 25 – 35 years                                     | 269 (65.6%)     | 734 (71.4%)  | 386 (66.8%) | 1056 (76.2%) |
| >35 years                                         | 52 (12.7%)      | 154 (15.0%)  | 106 (18.3%) | 199 (14.4%)  |
| <b>Maternal education when child was 9 months</b> |                 |              |             |              |
| Primary education                                 | 54 (13.2%)      | 77 (7.5%)    | 227 (39.3%) | 406 (29.3%)  |
| Some college/trade school                         | 118 (28.8%)     | 272 (26.5%)  | 103 (17.8%) | 226 (16.3%)  |
| College degree                                    | 216 (52.7%)     | 656 (63.8%)  | 233 (40.3%) | 746 (53.9%)  |
| Missing                                           | 22 (5.4%)       | 23 (2.2%)    | 15 (2.6%)   | 7 (0.5%)     |
| <b>Probiotics by age 90 days</b>                  |                 |              |             |              |
| No                                                | 248 (60.5%)     | 619 (60.2%)  | 454 (78.5%) | 1240 (89.5%) |
| Yes                                               | 162 (39.5%)     | 409 (39.8%)  | 124 (21.5%) | 145 (10.5%)  |
| <b>Flu vaccine received during pregnancy</b>      |                 |              |             |              |
| No                                                | 381 (95.0%)     | 1011 (99.0%) | 551 (95.7%) | 1380 (99.8%) |
| Yes                                               | 20 (5.0%)       | 10 (1.0%)    | 25 (4.3%)   | 3 (0.2%)     |
| <b>Child received seasonal flu vaccine</b>        |                 |              |             |              |
| No                                                | 294 (71.7%)     | 425 (41.3%)  | 572 (99.0%) | 1387 (98.7%) |
| Yes                                               | 116 (28.3%)     | 603 (58.7%)  | 6 (1.0%)    | 18 (1.3%)    |
| <b>HLA-DR genotype</b>                            |                 |              |             |              |
| DR4-DQ8/DR4-DQ8                                   | 59 (14.4%)      | 178 (17.3%)  | 136 (23.5%) | 292 (21.1%)  |
| DR3-DQ2/DR4-DQ8                                   | 146 (35.6%)     | 344 (33.5%)  | 221 (38.2%) | 587 (42.4%)  |
| DR4-DQ8/DR8-DQ4                                   | 123 (30.0%)     | 316 (30.7%)  | 83 (14.4%)  | 173 (12.5%)  |
| DR3-DQ2/DR3-DQ2                                   | 62 (15.1%)      | 148 (14.4%)  | 132 (22.8%) | 307 (22.2%)  |
| DR-DQ-FDR specific                                | 20 (4.9%)       | 42 (4.1%)    | 6 (1.0%)    | 26 (1.9%)    |
| <b>SNPs</b>                                       |                 |              |             |              |

|                              |             |             |             |              |
|------------------------------|-------------|-------------|-------------|--------------|
| <b>rs2476601 in PTPN22</b>   |             |             |             |              |
| <b>GG</b>                    | 297 (77.3%) | 708 (69.3%) | 452 (79.2%) | 1107 (80.2%) |
| <b>AG</b>                    | 78 (20.3%)  | 283 (27.7%) | 113 (19.8%) | 257 (18.6%)  |
| <b>AA</b>                    | 9 (2.3%)    | 31 (3.0%)   | 6 (1.1%)    | 16 (1.2%)    |
| <b>rs689 in INS-23Hph1</b>   |             |             |             |              |
| <b>TT</b>                    | 232 (60.4%) | 643 (62.9%) | 322 (56.4%) | 733 (53.1%)  |
| <b>AT</b>                    | 134 (34.9%) | 336 (32.9%) | 211 (37.0%) | 551 (39.9%)  |
| <b>AA</b>                    | 18 (4.7%)   | 43 (4.2%)   | 38 (6.7%)   | 96 (7.0%)    |
| <b>rs231775 in CTLA-4</b>    |             |             |             |              |
| <b>AA</b>                    | 93 (24.2%)  | 197 (19.3%) | 176 (30.8%) | 428 (31.0%)  |
| <b>AG</b>                    | 196 (51.0%) | 539 (52.7%) | 294 (51.5%) | 667 (48.3%)  |
| <b>GG</b>                    | 95 (24.7%)  | 286 (28.0%) | 101 (17.7%) | 285 (20.7%)  |
| <b>rs2292239 in ERBB3</b>    |             |             |             |              |
| <b>GG</b>                    | 170 (46.2%) | 472 (47.6%) | 206 (43.6%) | 540 (41.7%)  |
| <b>TG</b>                    | 160 (43.5%) | 426 (43.0%) | 218 (46.1%) | 593 (45.8%)  |
| <b>TT</b>                    | 38 (10.3%)  | 93 (9.4%)   | 49 (10.4%)  | 162 (12.5%)  |
| <b>rs3184504 in SH2B3</b>    |             |             |             |              |
| <b>CC</b>                    | 128 (34.8%) | 341 (34.4%) | 125 (26.4%) | 349 (26.9%)  |
| <b>TC</b>                    | 178 (48.4%) | 479 (48.3%) | 238 (50.3%) | 673 (52.0%)  |
| <b>TT</b>                    | 62 (16.8%)  | 171 (17.3%) | 110 (23.3%) | 273 (21.1%)  |
| <b>rs10517086</b>            |             |             |             |              |
| <b>GG</b>                    | 179 (48.6%) | 505 (51.0%) | 239 (50.5%) | 665 (51.4%)  |
| <b>AG</b>                    | 157 (42.7%) | 421 (42.5%) | 185 (39.1%) | 523 (40.4%)  |
| <b>AA</b>                    | 32 (8.7%)   | 65 (6.6%)   | 49 (10.4%)  | 107 (8.3%)   |
| <b>rs12708716 in CLEC16A</b> |             |             |             |              |
| <b>AA</b>                    | 173 (47.3%) | 454 (45.9%) | 206 (43.8%) | 560 (43.4%)  |
| <b>AG</b>                    | 146 (39.9%) | 430 (43.4%) | 209 (44.5%) | 587 (45.5%)  |
| <b>GG</b>                    | 47 (12.8%)  | 106 (10.7%) | 55 (11.7%)  | 144 (11.2%)  |
| <b>rs4948088 in COBL</b>     |             |             |             |              |
| <b>CC</b>                    | 347 (94.3%) | 933 (94.1%) | 412 (87.1%) | 1171 (90.4%) |
| <b>AC</b>                    | 20 (5.4%)   | 56 (5.7%)   | 59 (12.5%)  | 119 (9.2%)   |
| <b>CC</b>                    | 1 (0.3%)    | 2 (0.2%)    | 2 (0.4%)    | 5 (0.4%)     |
